# Supplementary material for: Collapsin response mediator protein-1 (CRMP1) acts as an invasion and metastasis suppressor of prostate cancer via its suppression of epithelial–mesenchymal transition and remodeling of actin cytoskeleton organization
Source: PubMed Central journal article supplement — Oncogene. 2016 Jun 20;36(4):546–58. doi: 10.1038/onc.2016.227 (PMC5290039; doi:10.1038/onc.2016.227), 2016-06-20
Supplement: onc2016227x8.pdf [file onc2016227x8.pdf]

**Supplementary Table S1. Primer pairs used for RT-PCR.**

| Gene                                                 | Forward primer         | Reverse primer          | GenBank accession number |
|------------------------------------------------------|------------------------|-------------------------|--------------------------|
| <i>CRMP1</i>                                         | GGCGGTGGAGTACAACATCT   | CACAGGACCGTCATACATGC    | NM_001313.3              |
| <i>CRMP1</i> variant 1 ( <i>LCRMP1</i> or long form) | TCGACTTCGACGCCTACAGTG  | AGTCGGTCACTCTGGCCATTGTC | NM_001014809             |
| <i>CRMP1</i> variant 2 (short form)                  | GAGCCTCCGTCCGTGTCTCTAT | TGAGGAGTCGGTCACTCGTG    | NM_001313.4              |
| <i>CDH1</i> (E-Cadherin)                             | TCCCATCAGCTGCCAGAAA    | TGACTCCTGTGTTCTGTTA     | NM_004360.3              |
| <i>CRB3</i> (crumbs family member 3)                 | AACCTGAGCTAGGTCAAAGACG | GAGGGAGAAGACCACGATGA    | NM_139161.3              |
| <i>EPCAM</i> (epithelial cell adhesion molecule)     | GCAGGGTCTAAAAGCTGGTG   | CCCTATGCATCTCACCCATC    | NM_002354.2              |
| <i>EPPK1</i> (epiplakin 1)                           | TTCAGAGGCCAGAAACCAAC   | GGTTCCTGCTTCTCGATCA     | NM_031308.1              |
| <i>OCN</i> (occludin)                                | TCCAATGGCAAAGTGAATGA   | GCAGGTGCTCTTTTTGAAGG    | NM_002538.3              |
| <i>MUC1</i> (mucin 1)                                | TACCGATCGTAGCCCTATG    | ACCTGAGTGGAGTGGAAATGG   | NM_002456.5              |
| <i>VIM</i> (Vimentin)                                | ACGCCATCAACACCGAGT     | GTGCCAGAGACGCATTGTC     | NM_003380.3              |
| <i>SNAIL1</i> (Snail1)                               | CGAAAGGCCTTCAACTGCAAAT | ACTGGTACTTCTTGACATCTG   | NM_005985.3              |
| <i>MMP2</i> (matrix metalloproteinase-2)             | GATACCCCTTTGACGGTAAGGA | CCTTCTCCAAGGTCCATAGC    | NM_004530.5              |
| <i>MMP9</i> (matrix metalloproteinase-9)             | TTGGTCCACCTGGTTCAACT   | ACGACGTCTTCCAGTACCGA    | NM_004994.2              |
| <i>DES</i> (desmin)                                  | AATGACCGCTTCGCCAACTA   | GGTTAGTGAGCACCTCCACC    | NM_212476.1              |
| <i>FNI</i> (fibronectin)                             | CCACCCTGGGTATGACACTG   | CATTCGGCGGGTATGGTCTT    | NM_212476.1              |
| <i>SNAIL2</i> (Snail family zinc finger 2)           | CACACGGGGGAGAAGCCTTT   | ATTGCGTCACTCAGTGTGCT    | NM_003068.4              |
| <i>ACTB</i> (b-actin)                                | CATGTACGTTGCTATCCAGGC  | CTCCTTAATGTCACGCACGAT   | NM_001101.3              |
| <i>GAPDH</i>                                         | AATGGACAACCTGGTCGTGGAC | CCCTCCAGGGGATCTGTTTG    | NM_002046.4              |
